# Supplementary material for: Unveiling Dynamic Changes of Chemical Constituents in Raw and Processed Fuzi With Different Steaming Time Points Using Desorption Electrospray Ionization Mass Spectrometry Imaging Combined With Metabolomics
Source: Frontiers journal article supplement (doi:10.3389/fphar.2022.842890), 2022-03-10
Supplement: Image_1.pdf [file Image_1.pdf]

# Supplementary Material

## 1 Supplementary Figures

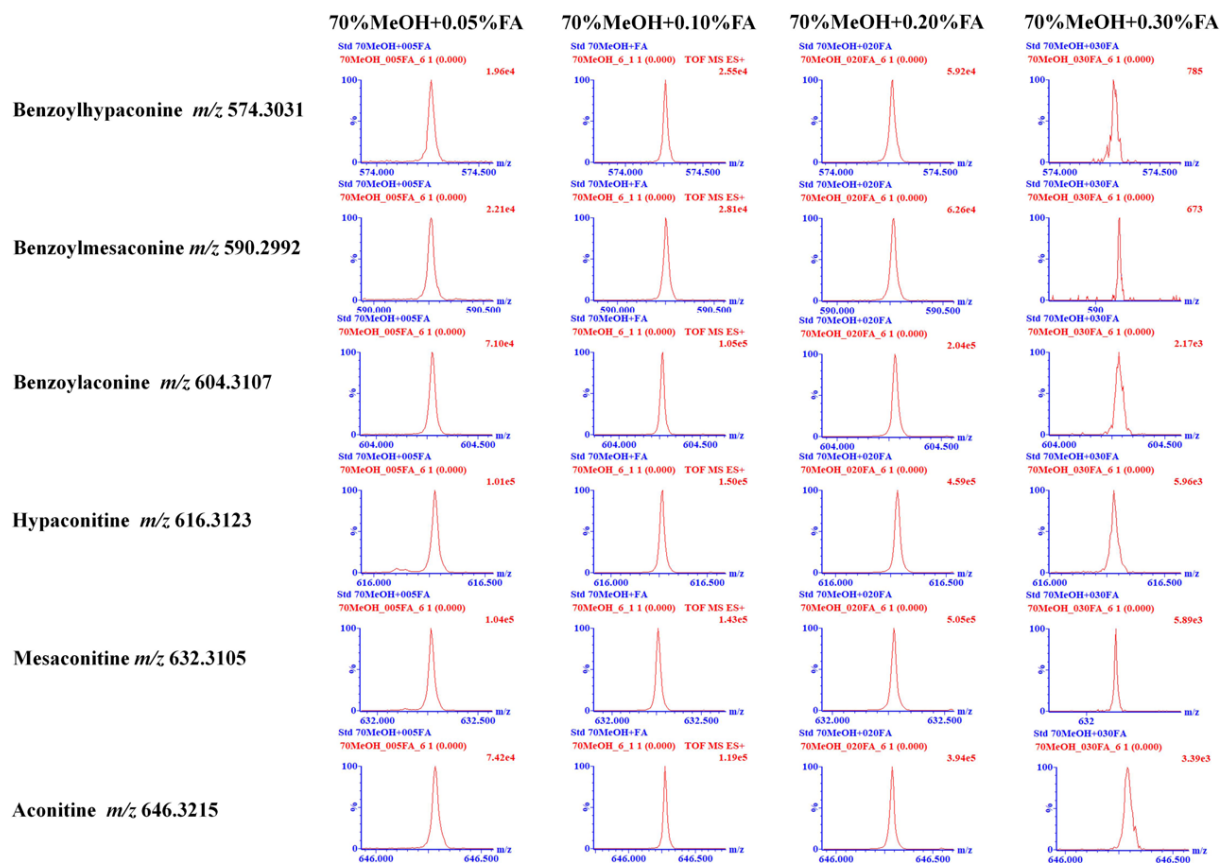

**Supplementary Figure S1.** Optimization of spray solvents for DESI-MSI analysis and the responses of the six investigated alkaloids.
