# Supplementary material for: Unveiling Dynamic Changes of Chemical Constituents in Raw and Processed Fuzi With Different Steaming Time Points Using Desorption Electrospray Ionization Mass Spectrometry Imaging Combined With Metabolomics
Source: Frontiers journal article supplement (doi:10.3389/fphar.2022.842890), 2022-03-10
Supplement: Image_2.pdf [file Image_2.pdf]

## Supplementary Material

### 1 Supplementary Figures

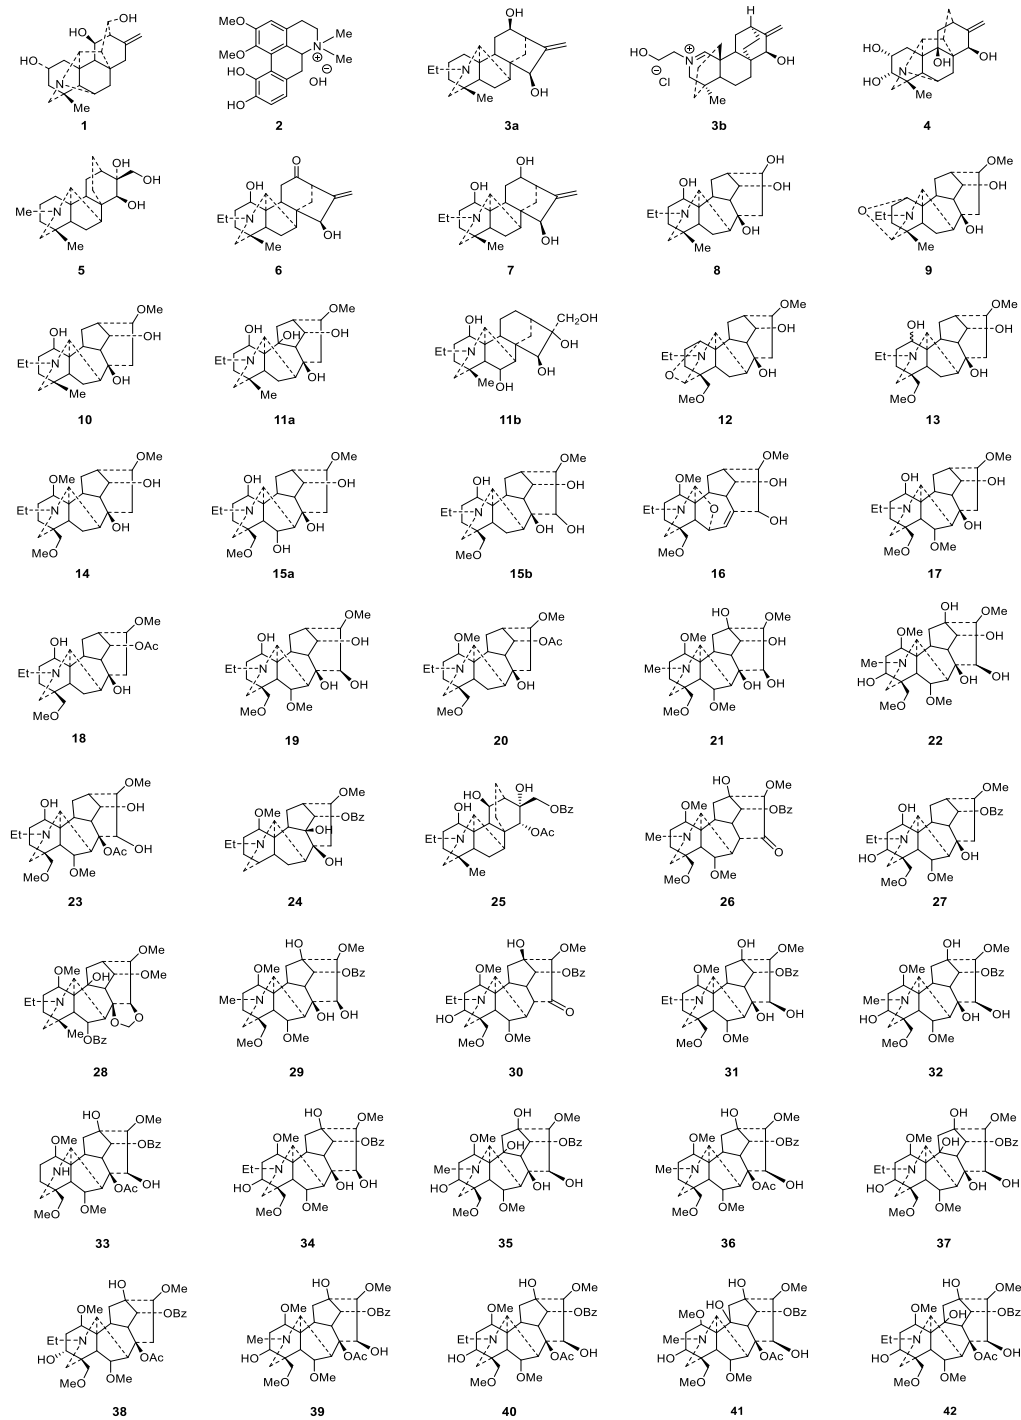

**Supplementary Figure S2.** Chemical structures of 42 metabolic markers of raw and processed Fuzi steamed for 0, 4.0 and 8.0 h.
